# Supplementary material for: Altersspezifische Trends des risikoreichen Alkoholkonsums in Deutschland: Parallele oder unterschiedliche Verläufe?
Source: Springer Nature journal article supplement (doi:10.1007/s00103-021-03328-7), 2021-05-12
Supplement: MOESM1 [file 19157462]

**Bundesgesundheitsblatt 6/2021**

Elektronisches Zusatzmaterial zum Beitrag:

## **Altersspezifische Trends des risikoreichen Alkoholkonsums in Deutschland: Parallele oder unterschiedliche Verläufe?**

Ludwig Kraus<sup>1,2,3</sup>, Johanna K. Loy<sup>1</sup>, Nicolas Wilms<sup>1</sup>, Anne Starker<sup>4</sup>

<sup>1</sup> IFT Institut für Therapieforschung, München, Deutschland

<sup>2</sup> Department of Public Health Sciences, Centre for Social Research on Alcohol and Drugs, Stockholm University, Stockholm, Schweden

<sup>3</sup> Institute of Psychology, ELTE Eötvös Loránd University, Budapest, Ungarn

<sup>4</sup> Abteilung für Epidemiologie und Gesundheitsmonitoring, Robert Koch-Institut, Berlin, Deutschland

### **Korrespondenzadresse**

Prof. Dr. phil. Ludwig Kraus  
IFT Institut für Therapieforschung  
Leopoldstr. 175  
80804 München  
Deutschland  
kraus@ift.de

### **Inhalt:**

**Tab. S1:** Schätzung der 30-Tage-Prävalenz des riskanten Alkoholkonsums in der Bevölkerung im Zeitraum von 1995 bis 2018 nach Altersgruppen und Geschlecht

**Tab. S2:** Schätzung der 30-Tage-Prävalenz des episodischen Rauschtrinkens von Alkohol in der Bevölkerung im Zeitraum von 1995 bis 2018 nach Altersgruppen und Geschlecht

**Tab. S1:** Schätzung der 30-Tage-Prävalenz des riskanten Alkoholkonsums in der Bevölkerung im Zeitraum von 1995 bis 2018 nach Altersgruppen und Geschlecht.  
Datenquelle: Epidemiologischer Suchtsurvey (ESA)

| Riskanter Konsum |     |      |              |     |      |              |     |      |              |     |      |              |     |      |              |     |      |              |     |      |              |     |      |              |     |      |              |  |  |
|------------------|-----|------|--------------|-----|------|--------------|-----|------|--------------|-----|------|--------------|-----|------|--------------|-----|------|--------------|-----|------|--------------|-----|------|--------------|-----|------|--------------|--|--|
| Männer           |     |      | 1995         |     |      | 1997         |     |      | 2000         |     |      | 2003         |     |      | 2006         |     |      | 2009         |     |      | 2012         |     |      | 2015         |     |      | 2018         |  |  |
| Alter            | n   | %    | 95 % KI      | n   | %    | 95 % KI      | n   | %    | 95 % KI      | n   | %    | 95 % KI      | n   | %    | 95 % KI      | n   | %    | 95 % KI      | n   | %    | 95 % KI      | n   | %    | 95 % KI      | n   | %    | 95 % KI      |  |  |
| 18 - 29          | 194 | 24,1 | [20.8; 27.7] | 201 | 22,0 | [18.3; 26.2] | 202 | 30,2 | [26.7; 33.9] | 223 | 17,1 | [15.1; 19.4] | 248 | 19,8 | [17.4; 22.4] | 245 | 17,3 | [15.5; 19.3] | 221 | 16,6 | [14.5; 18.9] | 261 | 16,1 | [14.2; 18.2] | 228 | 14,3 | [12.6; 16.3] |  |  |
| 30 - 39          | 271 | 28,7 | [25.6; 32.0] | 295 | 27,2 | [23.8; 30.8] | 249 | 27,4 | [24.6; 30.4] | 119 | 18,3 | [15.3; 21.7] | 78  | 14,7 | [11.7; 18.2] | 96  | 15,1 | [12.5; 18.2] | 72  | 14,4 | [11.3; 18.2] | 81  | 13,2 | [10.9; 16.0] | 79  | 10,8 | [8.5; 13.7]  |  |  |
| 40 - 49          | 271 | 30,9 | [27.2; 34.8] | 254 | 30,8 | [26.6; 35.4] | 273 | 31,7 | [28.4; 35.2] | 187 | 24,7 | [21.4; 28.4] | 127 | 20,6 | [17.4; 24.3] | 110 | 17,8 | [14.9; 21.1] | 102 | 14,3 | [11.8; 17.2] | 108 | 16,5 | [13.7; 19.7] | 78  | 11,8 | [9.5; 14.6]  |  |  |
| 50 - 59          | 317 | 31,6 | [28.4; 35.0] | 355 | 35,2 | [31.0; 39.6] | 318 | 34,0 | [30.7; 37.5] | 217 | 28,8 | [25.5; 32.4] | 145 | 22,2 | [19.2; 25.6] | 125 | 22,9 | [19.6; 26.5] | 159 | 19,8 | [16.9; 23.0] | 139 | 19,7 | [16.7; 23.1] | 108 | 15,2 | [12.7; 18.0] |  |  |
| 60 - 64          | -   | -    | -            | -   | -    | -            | -   | -    | -            | -   | -    | -            | 105 | 25,1 | [21.1; 29.4] | 74  | 23,5 | [19.3; 28.3] | 88  | 18,2 | [14.9; 22.2] | 95  | 23,7 | [19.9; 28.1] | 105 | 23,9 | [20.3; 28.0] |  |  |
| Frauen           |     |      | 1995         |     |      | 1997         |     |      | 2000         |     |      | 2003         |     |      | 2006         |     |      | 2009         |     |      | 2012         |     |      | 2015         |     |      | 2018         |  |  |
| Alter            | n   | %    | 95 % KI      | n   | %    | 95 % KI      | n   | %    | 95 % KI      | n   | %    | 95 % KI      | n   | %    | 95 % KI      | n   | %    | 95 % KI      | n   | %    | 95 % KI      | n   | %    | 95 % KI      | n   | %    | 95 % KI      |  |  |
| 18 - 29          | 144 | 13,4 | [11.1; 16.3] | 123 | 12,1 | [9.5; 15.4]  | 177 | 18,9 | [16.6; 21.6] | 232 | 14,0 | [12.1; 16.0] | 200 | 12,5 | [10.8; 14.3] | 282 | 16,2 | [14.5; 18.2] | 281 | 16,9 | [15.1; 18.9] | 307 | 17,6 | [15.7; 19.8] | 333 | 18,0 | [16.1; 20.0] |  |  |
| 30 - 39          | 223 | 15,8 | [13.6; 18.3] | 218 | 14,4 | [12.0; 17.1] | 247 | 20,9 | [18.3; 23.7] | 91  | 10,3 | [8.5; 12.4]  | 94  | 13,2 | [10.8; 16.0] | 98  | 11,8 | [9.8; 14.2]  | 87  | 10,4 | [8.4; 12.9]  | 80  | 9,5  | [7.6; 11.7]  | 74  | 8,6  | [6.9; 10.7]  |  |  |
| 40 - 49          | 229 | 21,5 | [18.7; 24.5] | 197 | 19,0 | [15.7; 22.9] | 234 | 23,1 | [20.5; 26.0] | 156 | 18,5 | [16.1; 21.3] | 119 | 14,8 | [12.4; 17.4] | 102 | 13,7 | [11.4; 16.3] | 126 | 14,3 | [12.0; 16.9] | 124 | 13,6 | [11.4; 16.2] | 117 | 13,6 | [11.5; 15.9] |  |  |
| 50 - 59          | 161 | 16,3 | [13.9; 19.0] | 172 | 20,1 | [16.6; 24.2] | 230 | 24,1 | [21.7; 26.8] | 150 | 19,0 | [16.3; 22.0] | 138 | 17,8 | [15.1; 20.8] | 103 | 15,5 | [12.9; 18.4] | 151 | 14,6 | [12.5; 16.9] | 146 | 16,7 | [14.3; 19.4] | 123 | 13,7 | [11.6; 16.0] |  |  |
| 60 - 64          | -   | -    | -            | -   | -    | -            | -   | -    | -            | -   | -    | -            | 81  | 18,9 | [15.2; 23.3] | 60  | 16,6 | [13.1; 20.8] | 84  | 14,8 | [12.0; 18.1] | 75  | 14,0 | [11.1; 17.6] | 71  | 14,4 | [11.5; 17.8] |  |  |

*n* Anzahl; *KI* Konfidenzintervall

**Tab. S2:** Schätzung der 30-Tage-Prävalenz des episodischen Rauschtrinkens von Alkohol in der Bevölkerung im Zeitraum von 1995 bis 2018 nach Altersgruppen und Geschlecht. Datenquelle: Epidemiologischer Suchtsurvey (ESA)

| Episodisches Rauschtrinken |     |      |              |     |      |              |     |      |              |     |      |              |     |      |              |     |      |              |     |      |              |     |      |              |     |      |              |  |  |
|----------------------------|-----|------|--------------|-----|------|--------------|-----|------|--------------|-----|------|--------------|-----|------|--------------|-----|------|--------------|-----|------|--------------|-----|------|--------------|-----|------|--------------|--|--|
| Männer                     |     |      | 1995         |     |      | 1997         |     |      | 2000         |     |      | 2003         |     |      | 2006         |     |      | 2009         |     |      | 2012         |     |      | 2015         |     |      | 2018         |  |  |
| Alter                      | n   | %    | 95 % KI      | n   | %    | 95 % KI      | n   | %    | 95 % KI      | n   | %    | 95 % KI      | n   | %    | 95 % KI      | n   | %    | 95 % KI      | n   | %    | 95 % KI      | n   | %    | 95 % KI      | n   | %    | 95 % KI      |  |  |
| 18 - 29                    | 383 | 46,0 | [42.1; 49.9] | 402 | 48,2 | [43.5; 53.0] | 346 | 48,1 | [44.3; 52.0] | 657 | 49,2 | [46.1; 52.4] | 652 | 52,0 | [48.8; 55.2] | 757 | 53,5 | [50.8; 56.2] | 709 | 53,0 | [50.0; 55.9] | 826 | 49,3 | [46.7; 52.0] | 724 | 45,1 | [42.6; 47.8] |  |  |
| 30 - 39                    | 457 | 50,6 | [47.0; 54.2] | 483 | 48,0 | [43.8; 52.2] | 404 | 41,2 | [37.2; 45.2] | 241 | 36,3 | [32.7; 40.1] | 194 | 36,6 | [32.5; 40.9] | 247 | 38,6 | [34.5; 42.9] | 215 | 41,8 | [37.4; 46.3] | 251 | 40,8 | [37.0; 44.6] | 265 | 36,3 | [32.8; 40.0] |  |  |
| 40 - 49                    | 393 | 47,3 | [43.3; 51.3] | 366 | 45,6 | [40.6; 50.6] | 358 | 38,8 | [35.0; 42.7] | 291 | 37,7 | [34.0; 41.5] | 199 | 32,9 | [29.1; 36.8] | 205 | 33,1 | [29.3; 37.2] | 203 | 28,2 | [25.1; 31.5] | 217 | 32,2 | [28.7; 36.0] | 212 | 30,6 | [27.0; 34.4] |  |  |
| 50 - 59                    | 458 | 46,3 | [42.6; 50.0] | 420 | 46,4 | [41.8; 51.0] | 339 | 33,5 | [30.0; 37.2] | 255 | 33,9 | [30.7; 37.2] | 190 | 28,7 | [25.0; 32.7] | 190 | 34,3 | [30.4; 38.5] | 252 | 31,0 | [27.6; 34.6] | 195 | 26,3 | [23.0; 29.9] | 204 | 28,4 | [25.1; 31.9] |  |  |
| 60 - 64                    | -   | -    | -            | -   | -    | -            | -   | -    | -            | -   | -    | -            | 98  | 23,5 | [19.4; 28.1] | 88  | 27,5 | [22.7; 32.9] | 116 | 23,4 | [19.7; 27.5] | 115 | 28,1 | [24.2; 32.4] | 110 | 25,1 | [21.3; 29.4] |  |  |
| Frauen                     |     |      | 1995         |     |      | 1997         |     |      | 2000         |     |      | 2003         |     |      | 2006         |     |      | 2009         |     |      | 2012         |     |      | 2015         |     |      | 2018         |  |  |
| Alter                      | n   | %    | 95 % KI      | n   | %    | 95 % KI      | n   | %    | 95 % KI      | n   | %    | 95 % KI      | n   | %    | 95 % KI      | n   | %    | 95 % KI      | n   | %    | 95 % KI      | n   | %    | 95 % KI      | n   | %    | 95 % KI      |  |  |
| 18 - 29                    | 215 | 21,8 | [18.8; 25.2] | 190 | 20,6 | [17.1; 24.6] | 220 | 22,2 | [19.5; 25.1] | 378 | 21,2 | [18.8; 23.7] | 429 | 25,2 | [22.8; 27.8] | 495 | 27,6 | [25.4; 30.0] | 505 | 28,9 | [26.5; 31.5] | 566 | 30,4 | [28.0; 32.8] | 579 | 30,1 | [27.8; 32.5] |  |  |
| 30 - 39                    | 251 | 19,3 | [16.9; 22.1] | 206 | 15,4 | [12.9; 18.2] | 138 | 11,0 | [9.3; 12.9]  | 104 | 11,5 | [9.6; 13.8]  | 97  | 13,4 | [10.8; 16.3] | 102 | 12,0 | [10.0; 14.3] | 112 | 13,0 | [10.9; 15.4] | 116 | 13,4 | [11.4; 15.8] | 144 | 16,1 | [13.8; 18.7] |  |  |
| 40 - 49                    | 224 | 21,7 | [18.9; 24.8] | 174 | 19,9 | [16.3; 24.1] | 118 | 10,8 | [9.0; 13.0]  | 89  | 10,7 | [8.6; 13.2]  | 93  | 11,6 | [9.4; 14.3]  | 67  | 8,8  | [7.0; 11.1]  | 100 | 11,1 | [9.1; 13.4]  | 105 | 11,1 | [9.2; 13.4]  | 106 | 12,1 | [10.2; 14.4] |  |  |
| 50 - 59                    | 176 | 16,7 | [14.3; 19.4] | 117 | 13,2 | [10.4; 16.7] | 77  | 7,6  | [5.8; 9.7]   | 70  | 8,7  | [6.9; 11.0]  | 64  | 8,2  | [6.4; 10.5]  | 45  | 6,7  | [5.0; 9.0]   | 98  | 9,4  | [7.7; 11.3]  | 91  | 10,3 | [8.4; 12.5]  | 101 | 11,2 | [9.3; 13.4]  |  |  |
| 60 - 64                    | -   | -    | -            | -   | -    | -            | -   | -    | -            | -   | -    | -            | 28  | 7,0  | [4.9; 10.0]  | 28  | 7,4  | [5.2; 10.3]  | 50  | 8,7  | [6.7; 11.1]  | 31  | 5,8  | [4.0; 8.3]   | 46  | 9,4  | [6.9; 12.5]  |  |  |

*n* Anzahl; *KI* Konfidenzintervall
